# Supplementary material for: Elevated blood lead and cadmium levels associated with chronic infections among non-smokers in a cross-sectional analysis of NHANES data
Source: PubMed Central journal article supplement (PMC4750187; doi:10.1186/s12940-016-0113-4), 2016-02-11
Supplement: 12940_2016_113_MOESM1_ESM.pdf [file 12940_2016_113_MOESM1_ESM.pdf]

Supplemental Tables

Table S1. Seropositivity associated with blood lead and cadmium levels, for each two-fold increase and across percentiles, among non-smoking NHANES participants, 1999-2012. Ages 13-35 years.

| Heavy metal                        | <i>H. pylori</i>      |                                     | <i>T. gondii</i>      |                             |
|------------------------------------|-----------------------|-------------------------------------|-----------------------|-----------------------------|
|                                    | Positive (Weighted %) | AOR (95% CI) <sup>a,b</sup>         | Positive (Weighted %) | AOR (95% CI) <sup>a,c</sup> |
| Per doubling of blood lead         | 18.6                  | <b>1.57 (1.18-2.09)<sup>d</sup></b> | 9.3                   | <b>1.25 (1.12-1.40)</b>     |
| Blood lead concentration (µg/dL)   |                       |                                     |                       |                             |
| Quartile 1                         | 10.1                  | Ref                                 | 5.2                   | Ref                         |
| Quartile 2                         | 17.5                  | 1.62 (0.96-2.73)                    | 7.2                   | 1.26 (0.91-1.75)            |
| Quartile 3                         | 23.5                  | <b>2.03 (1.17-3.52)</b>             | 11.3                  | <b>1.72 (1.26-2.36)</b>     |
| Quartile 4                         | 42.9                  | <b>3.49 (1.75-6.98)</b>             | 19.1                  | <b>1.99 (1.44-2.74)</b>     |
| <i>p for trend</i>                 |                       | 0.0001                              |                       | <0.0001                     |
| Per doubling of blood cadmium      | 18.6                  | <b>1.81 (1.29-2.55)</b>             | 9.3                   | 1.04 (0.87-1.25)            |
| Blood cadmium concentration (µg/L) |                       |                                     |                       |                             |
| Tertile 1                          | 11.6                  | Ref                                 | 6.0                   | Ref                         |
| Tertile 2                          | 21.8                  | <b>2.08 (1.52-2.86)</b>             | 9.4                   | 1.18 (0.80-1.74)            |
| Tertile 3                          | 25.4                  | <b>2.04 (1.27-3.29)</b>             | 11.3                  | 1.30 (0.93-1.82)            |
| <i>p for trend</i>                 |                       | 0.0034                              |                       | 0.43                        |

<sup>a</sup>Multivariable logistic regression used with survey procedures

<sup>b</sup>Adjusted for age, gender, race/ethnicity, country of birth origin, family income, self-reported general health condition, tap water source, and household crowding.

<sup>c</sup>Adjusted for NHANES cycle, age, gender, race/ethnicity, country of birth origin, family income, self-reported general health condition, and household crowding.

<sup>d</sup>Bolded font denotes statistically significant ( $\alpha < 0.05$ ).

Table S2. Seropositivity associated with blood lead and cadmium levels, for each two-fold increase and across percentiles, among non-smoking NHANES participants, 1999-2012. Over 35 years of age.

| Heavy metal                        | <i>H. pylori</i>      |                             | <i>T. gondii</i>      |                                     |
|------------------------------------|-----------------------|-----------------------------|-----------------------|-------------------------------------|
|                                    | Positive (Weighted %) | AOR (95% CI) <sup>a,b</sup> | Positive (Weighted %) | AOR (95% CI) <sup>a,c</sup>         |
| Per doubling of blood lead         | 31.7                  | 1.10 (0.94-1.28)            | 15.6                  | <b>1.21 (1.07-1.37)<sup>d</sup></b> |
| Blood lead concentration (µg/dL)   |                       |                             |                       |                                     |
| Quartile 1                         | 24.7                  | Ref                         | 9.0                   | Ref                                 |
| Quartile 2                         | 28.4                  | 1.06 (0.61-1.84)            | 13.0                  | 1.17 (0.78-1.77)                    |
| Quartile 3                         | 30.4                  | 1.13 (0.71-1.78)            | 17.2                  | 1.55 (1.05-2.29)                    |
| Quartile 4                         | 37.5                  | 1.18 (0.70-2.00)            | 18.5                  | 1.44 (0.98-2.10)                    |
| <i>p for trend</i>                 |                       | 0.43                        |                       | 0.027                               |
| Per doubling of blood cadmium      | 31.7                  | 1.22 (0.96-1.89)            | 15.6                  | 1.08 (0.95-1.23)                    |
| Blood cadmium concentration (µg/L) |                       |                             |                       |                                     |
| Tertile 1                          | 25.0                  | Ref                         | 12.0                  | Ref                                 |
| Tertile 2                          | 28.2                  | 0.96 (0.56-1.65)            | 13.7                  | 1.18 (0.80-1.74)                    |
| Tertile 3                          | 34.4                  | 1.06 (0.71-1.58)            | 17.5                  | 1.30 (0.93-1.82)                    |
| <i>p for trend</i>                 |                       | 0.72                        |                       | 0.092                               |

<sup>a</sup>Multivariable logistic regression used with survey procedures

<sup>b</sup>Adjusted for age, gender, race/ethnicity, country of birth origin, family income, self-reported general health condition, tap water source, and household crowding.

<sup>c</sup>Adjusted for NHANES cycle, age, gender, race/ethnicity, country of birth origin, family income, self-reported general health condition, and household crowding.

<sup>d</sup>Bolded font denotes statistically significant ( $\alpha < 0.05$ ).
